# Supplementary material for: The Reporting of a Disproportionality Analysis for Drug Safety Signal Detection Using Individual Case Safety Reports in PharmacoVigilance (READUS-PV): Development and Statement
Source: PubMed Central journal article supplement — Drug Saf. 2024 May 7;47(6):575–84. doi: 10.1007/s40264-024-01421-9 (PMC11116242; doi:10.1007/s40264-024-01421-9), 2024-05-07
Supplement: 40264_2024_1421_MOESM1_ESM.pdf [file 40264_2024_1421_MOESM1_ESM.pdf]

# The REporting of A Disproportionality analysis for drUG Safety signal detection using individual case safety reports in PharmacoVigilance (READUS-PV): development and statement

## Supplementary Material Drug Safety

Michele Fusaroli<sup>1</sup>, Francesco Salvo<sup>2,3\*</sup>, Bernard Begaud<sup>2</sup>, Thamir M. AlShammari<sup>4</sup>, Andrew Bate<sup>5,6</sup>, Vera Battini<sup>7</sup>, Andreas Brueckner<sup>8</sup>, Gianmario Candore<sup>9</sup>, Carla Carnovale<sup>7</sup>, Salvatore Crisafulli<sup>10</sup>, Paola Maria Cutroneo<sup>11</sup>, Charles Dolladille<sup>12-13</sup>, Milou-Daniel Drici<sup>14</sup>, Jean-Luc Faillie<sup>15</sup>, Adam Goldman<sup>16</sup>, Manfred Hauben<sup>17</sup>, Maria Teresa Herdeiro<sup>18</sup>, Olivia Mahaux<sup>5</sup>, Katrin Manlik<sup>9</sup>, François Montastruc<sup>19,20</sup>, Yoshihiro Noguchi<sup>21</sup>, G. Niklas Norén<sup>22</sup>, Roberta Nosedà<sup>23</sup>, Igho J. Onakpoya<sup>24</sup>, Antoine Pariente<sup>2,3</sup>, Elisabetta Poluzzi<sup>1</sup>, Myriam Salem<sup>25</sup>, Daniele Sartori<sup>22,26</sup>, Nhung TH Trinh<sup>27</sup>, Marco Tuccori<sup>28</sup>, Florence van Hunsel<sup>29,30</sup>, Eugène van Puijenbroek<sup>29,30</sup>, Emanuel Raschi<sup>1</sup>, Charles Khouri<sup>31,32\*</sup>

1. Department of Medical and Surgical Sciences, Alma Mater Studiorum, University of Bologna, Bologna, Italy
2. Université de Bordeaux, INSERM, BPH, Team AHead, U1219, F-33000 Bordeaux, France
3. CHU de Bordeaux, Service de Pharmacologie Médicale, INSERM, U1219, F-33000 Bordeaux, France
4. College of Pharmacy, Almaarefa University, Riyadh, Saudi Arabia
5. Global Safety, GSK, Brentford, UK
6. Dept of non-communicable Epidemiology, London School of Hygiene and Tropical Medicine, London, UK
7. Pharmacovigilance & Clinical Research, International Centre for Pesticides and Health Risk Prevention, Department of Biomedical and Clinical Sciences (DIBIC), ASST Fatebenefratelli-Sacco University Hospital, Università degli Studi di Milano, Milan, Italy.
8. Novartis
9. Bayer AG, Medical Affairs & Pharmacovigilance, Berlin, Germany
10. Department of Medicine, University of Verona, Verona, Italy
11. Sicily Pharmacovigilance Regional Centre - University Hospital of Messina, Unit of Clinical Pharmacology, Messina, Italy.
12. UNICAEN, EA4650 SEILIRM, CHU de Caen Normandie, Normandie University, Caen, France.
13. Department of Pharmacology, CHU de Caen Normandie, Caen, France.
14. Department of Clinical Pharmacology, Université Côte d'Azur Medical Center, Nice, France
15. Desbrest Institute of Epidemiology and Public Health, INSERM, Univ Montpellier, Regional Pharmacovigilance Centre, Department of Medical Pharmacology and Toxicology, CHU Montpellier, Montpellier, France
16. Leviev Heart Center, Chaim Sheba Medical Center, Ramat Gan, Israel; School of Medicine, Sackler Faculty of Medicine, Tel-Aviv University, Tel-Aviv, Israel.
17. Pfizer Inc.
18. IBIMED-Institute of Biomedicine, Department of Medical Sciences, University of Aveiro, 3810-193 Aveiro, Portugal.
19. Department of Medical and Clinical Pharmacology, Centre of PharmacoVigilance and Pharmacoepidemiology, Toulouse University Hospital (CHU), Faculty of Medicine, Toulouse, France
20. CIC 1436, Team PEPSS (Pharmacologie En Population cohorteS et biobanqueS), Toulouse University Hospital, Toulouse, France
21. Laboratory of Clinical Pharmacy, Gifu Pharmaceutical University, Japan
22. Uppsala Monitoring Centre, Uppsala, Sweden
23. Institute of Pharmacological Sciences of Southern Switzerland, Division of Clinical Pharmacology and Toxicology, Ente Ospedaliero Cantonale, Lugano, Switzerland.
24. Department for Continuing Education, University of Oxford, UK
25. Health Canada
26. Centre for Evidence-Based Medicine, Nuffield Department of Primary Care Health Sciences, University of Oxford, United Kingdom
27. PharmacoEpidemiology and Drug Safety Research Group, Department of Pharmacy, University of Oslo, Norway.
28. Tuscany Regional Centre – University Hospital of Pisa, Unit of Adverse Drug Reaction Monitoring, Pisa, Italy
29. Netherlands Pharmacovigilance centre Lareb, 's-Hertogenbosch, the Netherlands
30. University of Groningen, Groningen Research Institute of Pharmacy, PharmacoTherapy, - Epidemiology & -Economics, Groningen, the Netherlands
31. Univ. Grenoble Alpes, Pharmacovigilance Department, Grenoble Alpes University Hospital, Grenoble, France
32. Univ. Grenoble Alpes, INSERM UMR 1300-HP2 Laboratory, Grenoble Alpes University, Grenoble, France

\* Corresponding authors. Email: [CKhouri@chu-grenoble.fr](mailto:CKhouri@chu-grenoble.fr), [francesco.salvo@u-bordeaux.fr](mailto:francesco.salvo@u-bordeaux.fr)

Supplementary Figure 1. Decision rules for selecting items in the online Delphi process.

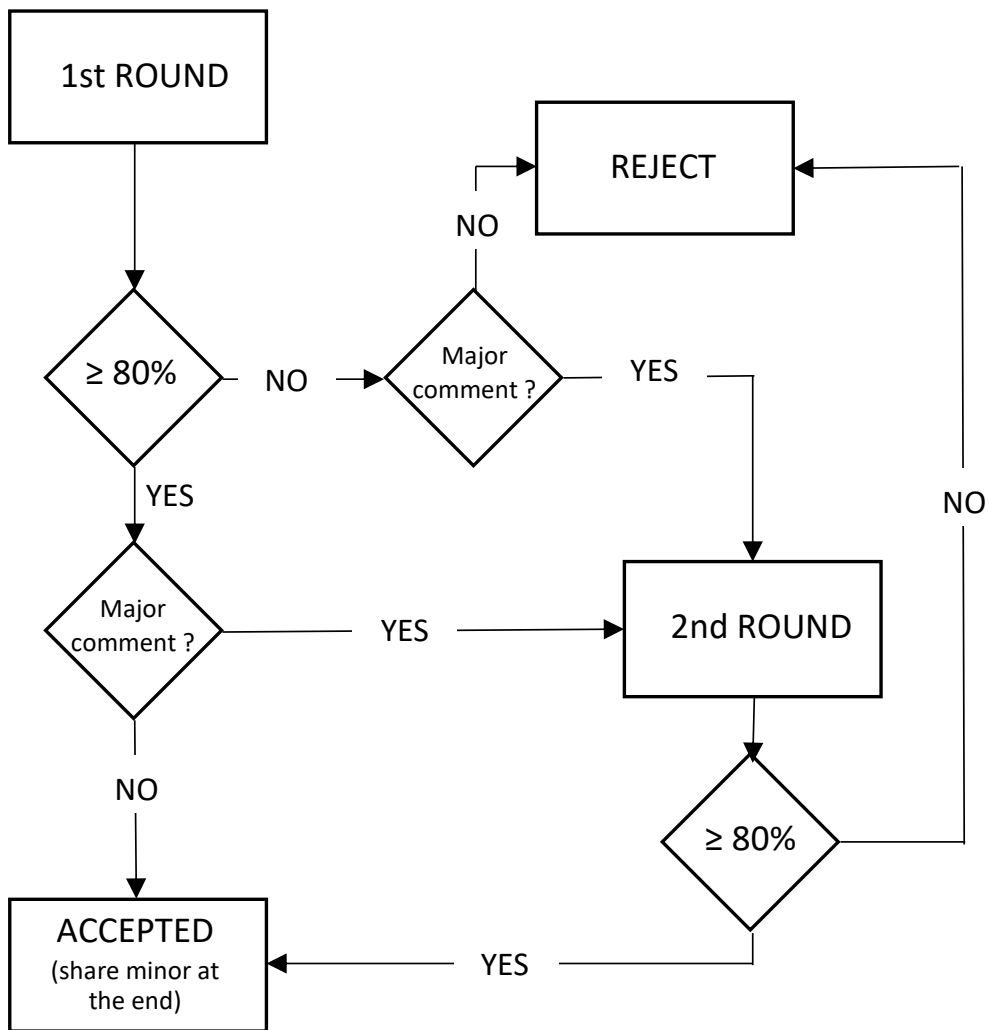

**Supplementary Table 1. The READUS-PV checklist**

| Section and topic                            | Item # | Checklist item                                                                                                                                                                                                                        | Location where item is reported |
|----------------------------------------------|--------|---------------------------------------------------------------------------------------------------------------------------------------------------------------------------------------------------------------------------------------|---------------------------------|
| <b>Title</b>                                 |        |                                                                                                                                                                                                                                       |                                 |
|                                              | 1a     | <i>If disproportionality analyses are a prominent component of the published study, the study should be identified as a “disproportionality analysis”. The type of data and name of the database(s) should be specified.</i>          |                                 |
|                                              | 1b     | <i>Report the name of adverse event(s) and/or drug(s) under study, when applicable.</i>                                                                                                                                               |                                 |
| <b>Introduction</b>                          |        |                                                                                                                                                                                                                                       |                                 |
| Background                                   | 2a     | <i>Describe the drug(s) and its utilization, the nature of the adverse event(s) under study and its frequency, and the existing knowledge on the drug-event combination.</i>                                                          |                                 |
|                                              | 2b     | <i>Specify the rationale for performing the analysis, e.g., as part of routine pharmacovigilance, to investigate an overall safety profile, or to assess a pre-specified hypothesis.</i>                                              |                                 |
|                                              | 2c     | <i>Explain why ICSR databases and disproportionality analysis are suitable to fill the knowledge gap.</i>                                                                                                                             |                                 |
| Objectives                                   | 3      | <i>State specific objectives, identifying the adverse event(s), the drug(s), and the reference group, including any pre-specified hypothesis, if applicable.</i>                                                                      |                                 |
| <b>Methods</b>                               |        |                                                                                                                                                                                                                                       |                                 |
| Study design                                 | 4a     | <i>Identify the study (i.e., “disproportionality analysis”) and the type of data used (e.g., “individual case safety reports”).</i>                                                                                                   |                                 |
|                                              | 4b     | <i>Provide an outline of the entire study design, including primary and sensitivity analyses performed, and other designs such as case-by-case analysis or literature review.</i>                                                     |                                 |
| Data description, access, and pre-processing | 5a     | <i>Specify the name of the database(s), the database(s) custodian, and the coverage. Specify the type/number of drugs included within the database and the thesaurus, taxonomies, or ontologies used for coding drugs and events.</i> |                                 |
|                                              | 5b     | <i>Specify the extraction dates and describe and justify all choices used for data pre-processing, including any data transformation or exclusion, if appropriate.</i>                                                                |                                 |
| Variables definition                         | 6a     | <i>Describe the study population, including any restriction.</i>                                                                                                                                                                      |                                 |
|                                              | 6b     | <i>Describe the nature and the meaning of key variables assessed in the work.</i>                                                                                                                                                     |                                 |
|                                              | 6c     | <i>Specify and justify any grouping of drugs or events. For drugs, specify and justify whether active ingredients/trade names/salts were considered and/or the selected role.</i>                                                     |                                 |
|                                              | 6d     | <i>Describe any additional data source used, the type of data, and how they interact with ICSRs.</i>                                                                                                                                  |                                 |
| Statistical methods                          | 7a     | <i>Present any descriptive analysis performed, specifying variables investigated, statistical tests, and significance thresholds.</i>                                                                                                 |                                 |
|                                              | 7b     | <i>Describe the measure(s) selected for the disproportionality analysis including any threshold used to identify signals of disproportionate reporting. Explain the reason for this choice if applicable.</i>                         |                                 |
|                                              | 7c     | <i>Clearly describe any sensitivity analysis and any tool to control confounding, including any restriction, subgroup, stratification, adjustment, or interaction.</i>                                                                |                                 |
|                                              | 7d     | <i>Specify the variables and methods used for the case-by-case analysis, including any algorithm or criteria used to assess causality, if performed.</i>                                                                              |                                 |
|                                              | 7e     | <i>Specify any statistical methods used for other data sources.</i>                                                                                                                                                                   |                                 |
| <b>Results</b>                               |        |                                                                                                                                                                                                                                       |                                 |
| Participants                                 | 8a     | <i>Specify the number of individual case safety reports included at each stage, including reasons for exclusion.</i>                                                                                                                  |                                 |
|                                              | 8b     | <i>Provide key demographic and clinical characteristics of cases, if possible comparing cases with any appropriate reference group.</i>                                                                                               |                                 |
| Disproportionality analysis                  | 9      | <i>Present all results including confidence intervals. Present also results of sensitivity analyses, if performed.</i>                                                                                                                |                                 |

|                       |     |                                                                                                                                                                                                                                |  |
|-----------------------|-----|--------------------------------------------------------------------------------------------------------------------------------------------------------------------------------------------------------------------------------|--|
| Case-by-case analysis | 10  | Present the case-by-case analysis of key variables. Present the causality assessment, if applicable.                                                                                                                           |  |
| <b>Discussion</b>     |     |                                                                                                                                                                                                                                |  |
| Key results           | 11  | Discuss key results with reference to study objectives and contextualize them within the current literature and other consulted sources. Clearly discriminate between expected reactions and emerging safety signals.          |  |
| External validity     | 12a | Discuss the external validity of the results to the general population.                                                                                                                                                        |  |
|                       | 12b | Discuss the potential relevance of results in clinical practice                                                                                                                                                                |  |
|                       | 12c | Propose further study designs if applicable                                                                                                                                                                                    |  |
| Limitations           | 13  | Present general limitations, making clear that disproportionality analysis alone cannot prove causation or measure incidence, and specific limitations, including confounding and reporting bias and efforts to mitigate them. |  |
| <b>Declarations</b>   |     |                                                                                                                                                                                                                                |  |
|                       | 14a | Provide the source of funding/sponsorship and the role of the funders/sponsors for the present study and for any original study on which the present article is based.                                                         |  |
|                       | 14b | Clearly identify potential commercial and intellectual conflicts of interest (e.g., link to any drug/event investigated, whether financial, legal action, or software used).                                                   |  |
|                       | 14c | Declare any institutional approval needed or granted in the investigation.                                                                                                                                                     |  |
|                       | 14d | Include a statement on data availability, code availability (including the version of the statistical software used), and protocol registration.                                                                               |  |

**Supplementary Table 2. The READUS-PV checklist for abstracts**

| Section and topic | Item # | Checklist item                                                                                                                               | Location where item is reported |
|-------------------|--------|----------------------------------------------------------------------------------------------------------------------------------------------|---------------------------------|
| Background        | 1a     | State the aim/rationale for performing the study.                                                                                            |                                 |
|                   | 1b     | Specify the adverse event(s) and/or the drug(s) under study, when applicable.                                                                |                                 |
|                   | 1c     | Specify the specific population or setting, when applicable.                                                                                 |                                 |
| Methods           | 2a     | Identify the study as a “disproportionality analysis” and specify the type of data used.                                                     |                                 |
|                   | 2b     | Specify the name of the database(s) used and the type of access.                                                                             |                                 |
|                   | 2c     | Specify the timeframe and geographical region, when applicable.                                                                              |                                 |
|                   | 2d     | Specify the disproportionality measure(s) used and their statistical significance threshold(s).                                              |                                 |
|                   | 2e     | Specify if a case-by-case analysis is performed.                                                                                             |                                 |
| Results           | 3      | Report main findings including their precision (e.g., 95% confidence intervals), together with a short summary of the case-by-case analysis. |                                 |
| Conclusion        | 4a     | Clearly report key conclusions.                                                                                                              |                                 |
|                   | 4b     | Acknowledge that the disproportionality analysis is a hypothesis generating or refinement approach.                                          |                                 |
|                   | 4c     | State the implications and clinical relevance of the findings.                                                                               |                                 |

**Supplementary Table 3. Items proposed by participants through the open text survey and deemed not suited for the reporting guideline or excluded during the DELPHI process.**

| Reason                                                                          | Item                                                                                                                                                                                                                                                                                                                                                                                                                                                                                                                                                                                                                                                                                                                                                                                                                                              |
|---------------------------------------------------------------------------------|---------------------------------------------------------------------------------------------------------------------------------------------------------------------------------------------------------------------------------------------------------------------------------------------------------------------------------------------------------------------------------------------------------------------------------------------------------------------------------------------------------------------------------------------------------------------------------------------------------------------------------------------------------------------------------------------------------------------------------------------------------------------------------------------------------------------------------------------------|
| Guideline for <b>conducting</b> (and not reporting) disproportionality analysis | Be careful in creating subsets where the number of reports is small.                                                                                                                                                                                                                                                                                                                                                                                                                                                                                                                                                                                                                                                                                                                                                                              |
|                                                                                 | Prefer to integrate frequentist and Bayesian                                                                                                                                                                                                                                                                                                                                                                                                                                                                                                                                                                                                                                                                                                                                                                                                      |
|                                                                                 | If the analysis investigates a class of drugs or a cluster of events, sub-analyses should be scheduled to identify possible leading drugs or events for the signal of disproportion.                                                                                                                                                                                                                                                                                                                                                                                                                                                                                                                                                                                                                                                              |
|                                                                                 | For the granularity of events, 'Preferred Terms' (PT) should be preferred, otherwise justify                                                                                                                                                                                                                                                                                                                                                                                                                                                                                                                                                                                                                                                                                                                                                      |
|                                                                                 | For the granularity of drugs, whenever possible, the International Non-proprietary Name of the drugs should be preferred.                                                                                                                                                                                                                                                                                                                                                                                                                                                                                                                                                                                                                                                                                                                         |
|                                                                                 | For adjustment/stratification, do not set more covariates than necessary (only variables that are thought to impact the results in a consistent way) since patient information obtained from the spontaneous reporting system is limited and subgroups may be too small.                                                                                                                                                                                                                                                                                                                                                                                                                                                                                                                                                                          |
|                                                                                 | Subgroup analyses may be preferred, when compared to stratified analysis, as they seem to show a better performance.                                                                                                                                                                                                                                                                                                                                                                                                                                                                                                                                                                                                                                                                                                                              |
|                                                                                 | a minimum of 500 for national and 5000 reports for international databases is recommended to limit the number of false-positive associations                                                                                                                                                                                                                                                                                                                                                                                                                                                                                                                                                                                                                                                                                                      |
|                                                                                 | In case of negative disproportionality analysis, it could be interesting to estimate how many additional cases would be needed to turn the disproportionality significant.                                                                                                                                                                                                                                                                                                                                                                                                                                                                                                                                                                                                                                                                        |
|                                                                                 | Use appropriate strategies to test for statistical significance in descriptive analyses                                                                                                                                                                                                                                                                                                                                                                                                                                                                                                                                                                                                                                                                                                                                                           |
|                                                                                 | Always descriptive against the most appropriate reference group                                                                                                                                                                                                                                                                                                                                                                                                                                                                                                                                                                                                                                                                                                                                                                                   |
|                                                                                 | Explore issues of extrapolations (when there is only a limited overlap between the characteristics of the exposed population and the characteristics of the comparator). Adjustments of the disproportionality measure should be performed using at least those variables for which a significant difference has been observed.                                                                                                                                                                                                                                                                                                                                                                                                                                                                                                                   |
|                                                                                 | Give both unadjusted and adjusted disproportionalities                                                                                                                                                                                                                                                                                                                                                                                                                                                                                                                                                                                                                                                                                                                                                                                            |
|                                                                                 | Quantitative data should be completed by case-by-case information: authors should try to obtain a precise imputability analysis (Naranjo scale, WHO score) for at least some of the queried reports for instance by retrieving more information from their national database. To define new potential safety signals and partly exclude other potential risk factors. If applicable, dechallenge and rechallenge analysis could reinforce drug-event association. Analysing time to event onset could provide meaningful clinical knowledge. possible alternative causative agents distribution                                                                                                                                                                                                                                                   |
|                                                                                 | Ambiguous                                                                                                                                                                                                                                                                                                                                                                                                                                                                                                                                                                                                                                                                                                                                                                                                                                         |
|                                                                                 | Include negative results, if applicable                                                                                                                                                                                                                                                                                                                                                                                                                                                                                                                                                                                                                                                                                                                                                                                                           |
| <b>&lt;80% Agreement</b>                                                        | Objectives : <ul style="list-style-type: none"> <li>• Specify granularity of events and drugs and its rationale (e.g., same mechanism, pathogenesis)</li> </ul>                                                                                                                                                                                                                                                                                                                                                                                                                                                                                                                                                                                                                                                                                   |
|                                                                                 | Methods: <ul style="list-style-type: none"> <li>• Provide a general description of the data collection process.</li> <li>• Describe the structure and available fields</li> <li>• Describe the access extent (e.g., public, pharmacovigilance center, aggregated data, narratives).</li> <li>• Provide each definition as the presence in a specific field(s) of a standardized or free-text term(s).</li> <li>• Clearly state how the time window(s) during which an individual was considered exposed to the drug(s) was/were defined (e.g. as time gap between drug end date and drug start date)</li> <li>• Show contingency tables, relevant mathematical formulas, and any hyperparameters</li> <li>• Describe and justify minimum sample size and statistical power for rare events, small databases, subgroups, if applicable.</li> </ul> |
|                                                                                 | Results : <ul style="list-style-type: none"> <li>• Specify when the first and last cases were found</li> <li>• Specify the median number of reports per year</li> <li>• Report combinations of medical products and events not exceeding the pre-specified threshold(s)</li> <li>• Report whether each statistical signal was previously documented and the source</li> </ul>                                                                                                                                                                                                                                                                                                                                                                                                                                                                     |

|                                  |                                                                                                                                                                                                                                                                                                                                                                                                                                                                                                         |
|----------------------------------|---------------------------------------------------------------------------------------------------------------------------------------------------------------------------------------------------------------------------------------------------------------------------------------------------------------------------------------------------------------------------------------------------------------------------------------------------------------------------------------------------------|
|                                  | <p>Discussion :</p> <ul style="list-style-type: none"> <li>• Discuss how database and healthcare have changed over time of study</li> <li>• Provide a script/code availability statement</li> <li>• Share the script/code used</li> <li>• Provide the exact query for medical products and adverse events, comparison and confounders.</li> </ul>                                                                                                                                                       |
|                                  | <p>Abstract :</p> <ul style="list-style-type: none"> <li>• Introduce previous evidence from published and unpublished documents</li> <li>• Specify terminologies or dictionaries used</li> <li>• Complement main findings with corresponding expected counts</li> <li>• Integrate with a comprehensive clinical assessment of individual reports, including coherence, if applicable</li> <li>• Discuss main aspects of internal and external validity</li> <li>• Propose future directions.</li> </ul> |
| <p>Proposed after<br/>Delphi</p> | <ul style="list-style-type: none"> <li>• Declaration item concerning role and participation of authors.</li> <li>• Declaration item concerning patient and public involvement.</li> </ul>                                                                                                                                                                                                                                                                                                               |
